# Supplementary material for: Androgen deprivation therapy increases brain ageing
Source: PubMed Central journal article supplement (PMC6710035; doi:10.18632/aging.102142), 2019-08-02
Supplement: aging-11-102142-s002.pdf [file aging-11-102142-s002.pdf]

SUPPLEMENTARY FIGURES

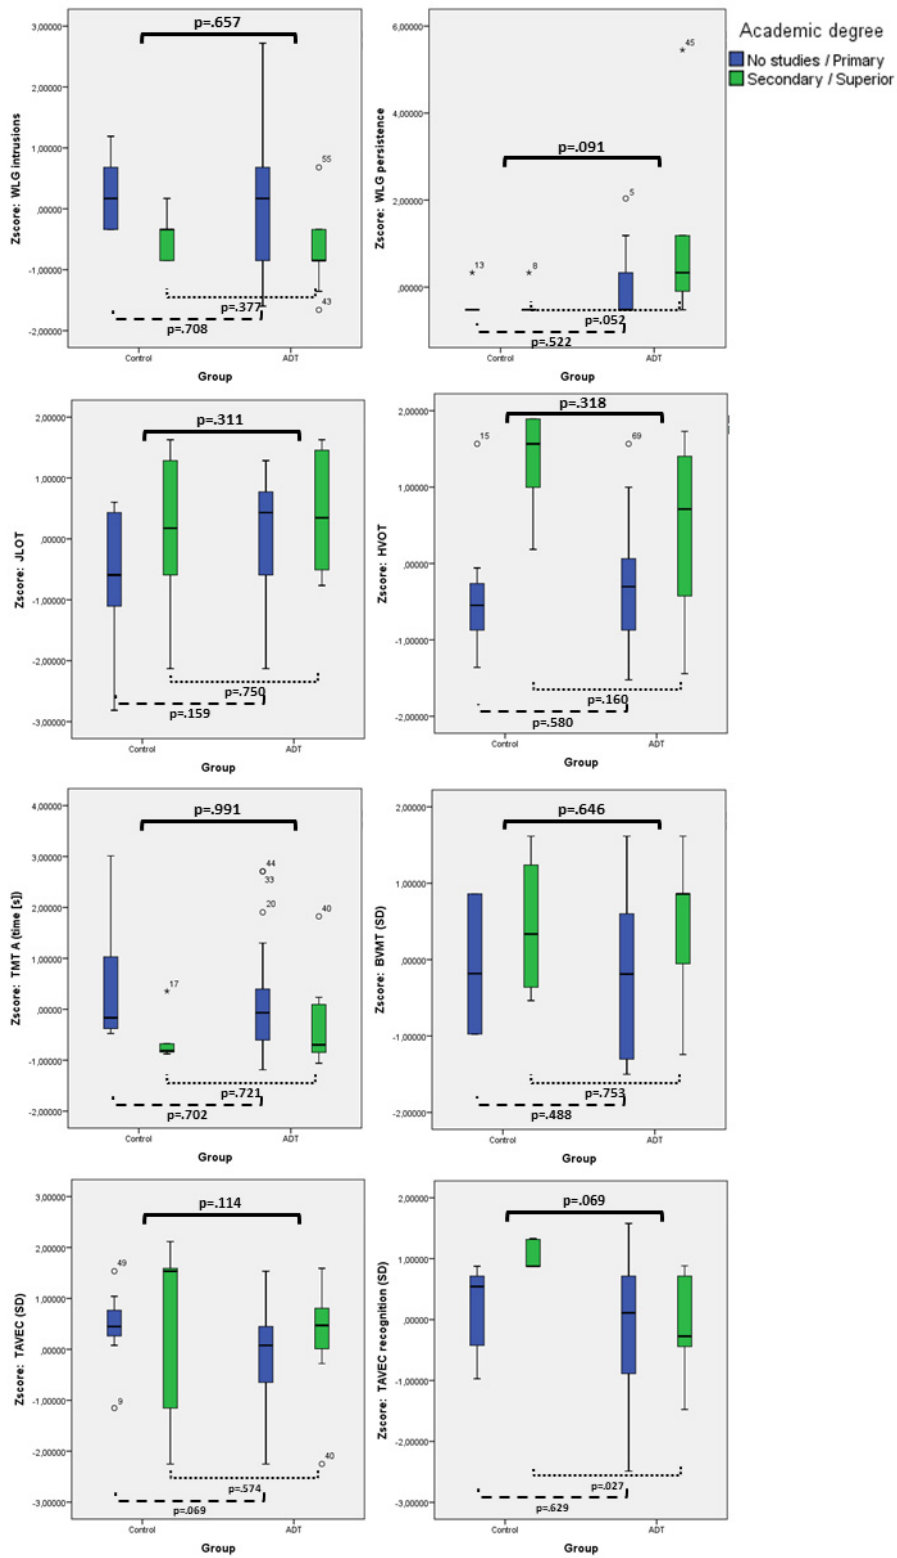

**Supplementary Figure 1. Intergroup comparison between control and ADT groups.** Upper p-value represents the level of significance of the comparison between control and ADT group without considering educational level. Lower p-values represent the level of significance between control and ADT groups with low-educational level (discontinuous line) and with high-educational level (dotted line).

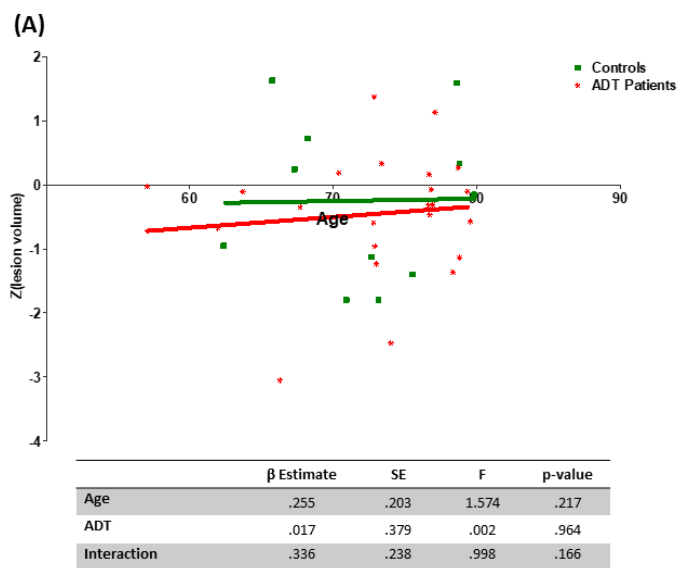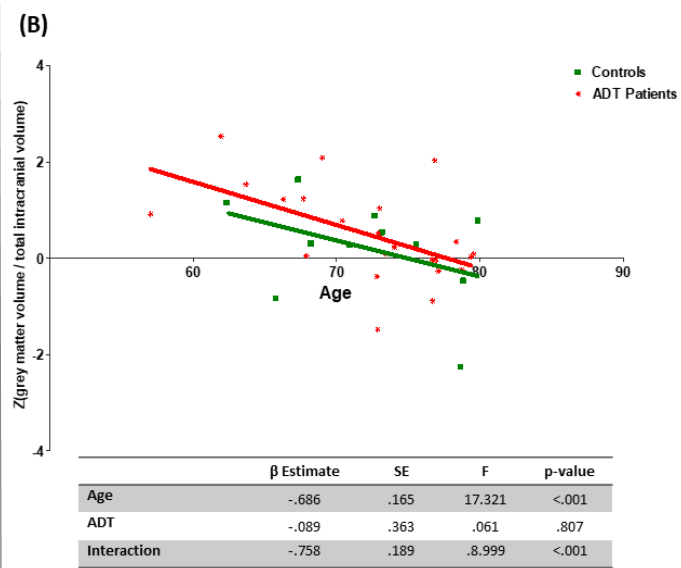

**Supplementary Figure 2. Main effect of age and ADT and age-by-group interaction effect on lesion volume and GMV considering only patients younger than 80 years of age.**
