# Supplementary material for: Androgen deprivation therapy increases brain ageing
Source: publisher site journal article supplement (doi:10.18632/aging.102142), 2019-08-02
Supplement: Supplementary file [file aging-v11i15-102142-supplementary-material-SD1.pdf]

## SUPPLEMENTARY TABLES

**Supplementary Table 1. Intragroup comparison between different educational levels.** Non-parametric two sample test (Mann-Whitney U) was used (significant  $p < .05$ ). The scores of cognitive tests are represented by the mean of Z-scores.

|                                         | Control group<br>(n=15) |                        | p-value | ADT group<br>(n=50)   |                        | p-value |
|-----------------------------------------|-------------------------|------------------------|---------|-----------------------|------------------------|---------|
|                                         | Low-educational level   | High-educational level |         | Low-educational level | High-educational level |         |
| <b>Verbal fluency (phonetic)</b>        |                         |                        |         |                       |                        |         |
| <i>WLG intrusions</i>                   | 0.25543                 | -0.44145               | .126    | 0.23473               | -0.69085               | .017    |
| <i>WLG persistence</i>                  | -0.37913                | -0.3507                | .931    | -0.12525              | 0.87459                | .022    |
| <b>Verbal fluency (semantic)</b>        |                         |                        |         |                       |                        |         |
| <i>COWAT intrusions</i>                 | -0.13019                | -0.13019               | 1.000   | 0.10985               | -0.13019               | .886    |
| <i>COWAT persistence</i>                | -0.3336                 | -0.3336                | 1.000   | 0.12771               | 0.07645                | .668    |
| <b>Visuospatial and visuoperception</b> |                         |                        |         |                       |                        |         |
| <i>JLOT</i>                             | -0.67876                | 0.08973                | .310    | 0.0071                | 0.43128                | .341    |
| <i>HVOT</i>                             | -0.37287                | 1.30669                | .010    | -0.32416              | 0.48956                | .014    |
| <b>Processing speed</b>                 |                         |                        |         |                       |                        |         |
| <i>TMT A (time [s])</i>                 | 0.52413                 | -0.57071               | .048    | 0.11927               | -0.34511               | .130    |
| <b>Visual memory</b>                    |                         |                        |         |                       |                        |         |
| <i>BVMT (SD)</i>                        | -0.08155                | 0.43814                | .556    | -0.28614              | 0.50517                | .029    |
| <b>Verbal memory</b>                    |                         |                        |         |                       |                        |         |
| <i>TAVEC (SD)</i>                       | 0.41293                 | 0.36765                | .639    | -0.19468              | 0.31948                | .038    |
| <i>TAVEC recognition (SD)</i>           | 0.14694                 | 1.05542                | .018    | -0.12084              | -0.01259               | .825    |

**Supplementary Table 2. Results of the linear regression analyses considering the score of each cognitive test as a dependent variable.**

|                           | $\beta$ Estimate | SE   | F     | p-value |
|---------------------------|------------------|------|-------|---------|
| <b>WLG intrusions</b>     |                  |      |       |         |
| <i>Age</i>                | -.140            | .183 | .794  | .450    |
| <i>Lesion</i>             | -.021            | .173 | .204  | .902    |
| <i>ADT</i>                | -.131            | .436 | .090  | .765    |
| <i>ADT * Lesion</i>       | .318             | .609 | .273  | .604    |
| <i>Age * ADT</i>          | .653             | .420 | 2.424 | .128    |
| <i>Age * Lesion</i>       | -.224            | .178 | .581  | .214    |
| <i>Age * ADT * Lesion</i> | -.060            | .510 | .014  | .907    |
| <b>WLG persistence</b>    |                  |      |       |         |
| <i>Age</i>                | .130             | .184 | .221  | .486    |
| <i>Lesion</i>             | .293             | .174 | .446  | .101    |
| <i>ADT</i>                | .364             | .438 | .690  | .411    |
| <i>ADT * Lesion</i>       | .177             | .613 | .083  | .775    |
| <i>Age * ADT * Lesion</i> | .090             | .513 | .031  | .861    |

|                           |       |      |        |              |
|---------------------------|-------|------|--------|--------------|
| <i>Age * Lesion</i>       | .281  | .179 | .841   | .125         |
| <i>Age * ADT * Lesion</i> | .090  | .513 | .031   | .861         |
| <b>COWAT intrusions</b>   |       |      |        |              |
| <i>Age</i>                | .215  | .186 | .236   | .253         |
| <i>Lesion</i>             | -.348 | .183 | .425   | .064         |
| <i>ADT</i>                | .269  | .483 | .311   | .580         |
| <i>ADT * Lesion</i>       | -.348 | .533 | .425   | .518         |
| <i>Age * ADT</i>          | .215  | .443 | .236   | .630         |
| <i>Age * Lesion</i>       | -.328 | .188 | .492   | .088         |
| <i>Age * ADT * Lesion</i> | .328  | .468 | .492   | .487         |
| <b>COWAT persistence</b>  |       |      |        |              |
| <i>Age</i>                | -.174 | .192 | .145   | .369         |
| <i>Lesion</i>             | .069  | .189 | .016   | .718         |
| <i>ADT</i>                | .577  | .499 | 1.337  | .254         |
| <i>ADT * Lesion</i>       | .069  | .550 | .016   | .901         |
| <i>Age * ADT</i>          | -.174 | .458 | .145   | .705         |
| <i>Age * Lesion</i>       | -.142 | .194 | .087   | .467         |
| <i>Age * ADT * Lesion</i> | .142  | .483 | .087   | .770         |
| <b>JLOT</b>               |       |      |        |              |
| <i>Age</i>                | -.047 | .159 | 8.299  | .768         |
| <i>Lesion</i>             | .153  | .156 | 3.252  | .331         |
| <i>ADT</i>                | 1.211 | .447 | 7.342  | <b>.010*</b> |
| <i>ADT * Lesion</i>       | -.506 | .456 | 1.281  | .264         |
| <i>Age * ADT</i>          | 1.099 | .414 | 7.039  | <b>.011*</b> |
| <i>Age * Lesion</i>       | .002  | .160 | 1.835  | .988         |
| <i>Age * ADT * Lesion</i> | -.558 | .415 | 1.804  | .187         |
| <b>HVOT</b>               |       |      |        |              |
| <i>Age</i>                | -.337 | .147 | 11.937 | <b>.027*</b> |
| <i>Lesion</i>             | .023  | .144 | .375   | .872         |
| <i>ADT</i>                | .276  | .358 | .594   | .445         |
| <i>ADT * Lesion</i>       | .287  | .393 | .534   | .469         |
| <i>Age * ADT</i>          | .529  | .348 | 2.309  | .136         |
| <i>Age * Lesion</i>       | .068  | .149 | .027   | .648         |
| <i>Age * ADT * Lesion</i> | .077  | .363 | .045   | .832         |
| <b>TMT A</b>              |       |      |        |              |
| <i>Age</i>                | .173  | .165 | 5.356  | .298         |
| <i>Lesion</i>             | .125  | .156 | .764   | .428         |
| <i>ADT</i>                | -.539 | .386 | 1.949  | .171         |
| <i>ADT * Lesion</i>       | -.120 | .422 | .080   | .778         |
| <i>Age * ADT</i>          | -.525 | .377 | 1.941  | .171         |
| <i>Age * Lesion</i>       | .043  | .160 | .129   | .791         |
| <i>Age * ADT * Lesion</i> | -.055 | .390 | .020   | .888         |
| <b>BVMT</b>               |       |      |        |              |
| <i>Age</i>                | -.013 | .197 | 1.809  | .947         |
| <i>Lesion</i>             | .100  | .203 | .058   | .625         |
| <i>ADT</i>                | .035  | .573 | .004   | .952         |
| <i>ADT * Lesion</i>       | .329  | .534 | .381   | .542         |
| <i>Age * ADT</i>          | .650  | .503 | 1.671  | .206         |
| <i>Age * Lesion</i>       | .014  | .187 | .809   | .942         |
| <i>Age * ADT * Lesion</i> | .454  | .474 | .916   | .346         |
| <b>TAVEC (SD)</b>         |       |      |        |              |
| <i>Age</i>                | .123  | .154 | .054   | .427         |
| <i>Lesion</i>             | -.135 | .151 | .141   | .377         |
| <i>ADT</i>                | -.435 | .379 | 1.322  | .256         |
| <i>ADT * Lesion</i>       | -.426 | .416 | 1.049  | .311         |
| <i>Age * ADT</i>          | .161  | .368 | .192   | .663         |
| <i>Age * Lesion</i>       | .004  | .154 | .042   | .980         |
| <i>Age * ADT * Lesion</i> | -.071 | .383 | .035   | .853         |
| <b>TAVEC</b>              |       |      |        |              |
| <i>Age</i>                | -.010 | .170 | .898   | .956         |
| <i>Lesion</i>             | -.090 | .168 | .044   | .594         |
| <i>ADT</i>                | -.458 | .417 | 1.207  | .278         |
| <i>ADT * Lesion</i>       | -.084 | .458 | .033   | .856         |
| <i>Age * ADT</i>          | .365  | .406 | .811   | .373         |
| <i>Age * Lesion</i>       | .235  | .172 | .355   | .179         |
| <i>Age * ADT * Lesion</i> | .218  | .423 | .266   | .609         |
